# Supplementary material for: Phytochemical Analysis, Pharmacological and Safety Evaluations of Halophytic Plant, Salsola cyclophylla
Source: MDPI journal article supplement (doi:10.3390/molecules26082384), 2021-04-20
Supplement: s1 [file s1]

**Figure S1: LC-MS chromatogram**

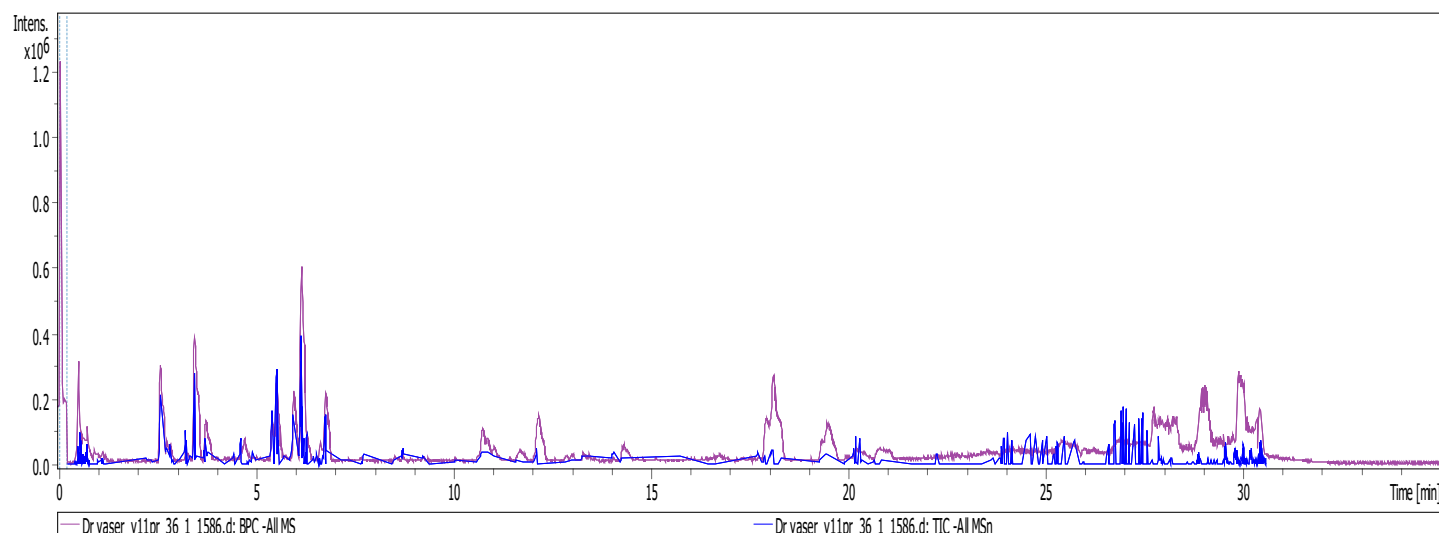

**Table S1: Anti-inflammatory activity raw data**

| Olive Oil          | 0 Hour      | 1 Hour      | 2 Hour      | 3 Hour      | 6 Hour      | 24 Hour     |
|--------------------|-------------|-------------|-------------|-------------|-------------|-------------|
| Rat 1              | 1           | 1.06        | 1.55        | 1.62        | 1.6         | 1.49        |
| Rat 2              | 1.02        | 1.05        | 1.47        | 1.46        | 1.48        | 1.42        |
| Rat 3              | 1.07        | 1.11        | 1.53        | 1.55        | 1.54        | 1.49        |
| Rat 4              | 1.03        | 1.07        | 1.52        | 1.54        | 1.54        | 1.47        |
| Rat 5              | 1.04        | 1.08        | 1.53        | 1.55        | 1.55        | 1.48        |
| Rat 6              | 1.02        | 1.06        | 1.51        | 1.53        | 1.53        | 1.46        |
| <b>Average</b>     | <b>1.03</b> | <b>1.07</b> | <b>1.52</b> | <b>1.54</b> | <b>1.54</b> | <b>1.47</b> |
| <b>S.D</b>         | <b>0.02</b> | <b>0.02</b> | <b>0.03</b> | <b>0.05</b> | <b>0.04</b> | <b>0.03</b> |
| <b>n</b>           | <b>6.00</b> | <b>6.00</b> | <b>6.00</b> | <b>6.00</b> | <b>6.00</b> | <b>6.00</b> |
| <b>S.E</b>         | <b>0.01</b> | <b>0.01</b> | <b>0.01</b> | <b>0.02</b> | <b>0.02</b> | <b>0.01</b> |
|                    |             |             |             |             |             |             |
| <b>Diclofenac</b>  |             |             |             |             |             |             |
| Rat 1              | 0.95        | 0.97        | 1           | 1.14        | 1.21        | 1.32        |
| Rat 2              | 0.99        | 1.01        | 1.03        | 1.11        | 1.19        | 1.29        |
| Rat 3              | 0.96        | 0.97        | 0.99        | 1.04        | 1.15        | 1.25        |
| Rat 4              | 0.97        | 0.98        | 1.01        | 1.10        | 1.18        | 1.29        |
| Rat 5              | 0.98        | 0.99        | 1.02        | 1.11        | 1.19        | 1.3         |
| Rat 6              | 0.96        | 0.97        | 1           | 1.09        | 1.17        | 1.28        |
| <b>Average</b>     | <b>0.97</b> | <b>0.98</b> | <b>1.01</b> | <b>1.10</b> | <b>1.18</b> | <b>1.29</b> |
| <b>S.D</b>         | <b>0.01</b> | <b>0.02</b> | <b>0.01</b> | <b>0.03</b> | <b>0.02</b> | <b>0.02</b> |
| <b>n</b>           | <b>6.00</b> | <b>6.00</b> | <b>6.00</b> | <b>6.00</b> | <b>6.00</b> | <b>6.00</b> |
| <b>S.E</b>         | <b>0.01</b> | <b>0.01</b> | <b>0.01</b> | <b>0.01</b> | <b>0.01</b> | <b>0.01</b> |
|                    |             |             |             |             |             |             |
| <b>Aq.-ethanol</b> |             |             |             |             |             |             |
| Rat 1              | 1.06        | 0.9         | 0.92        | 1.1         | 1.4         | 1.45        |
| Rat 2              | 1.04        | 0.76        | 0.81        | 0.92        | 0.97        | 1.18        |

|                |             |             |             |             |             |             |
|----------------|-------------|-------------|-------------|-------------|-------------|-------------|
| Rat 3          | 1.02        | 1.02        | 0.9         | 1.01        | 1.1         | 1.36        |
| Rat 4          | 1.04        | 0.89        | 0.88        | 1.01        | 1.16        | 1.33        |
| Rat 5          | 1.05        | 0.9         | 0.99        | 1.02        | 1.17        | 1.34        |
| Rat 6          | 1.03        | 0.88        | 0.87        | 1           | 1.15        | 1.32        |
| <b>Average</b> | <b>1.04</b> | <b>0.89</b> | <b>0.89</b> | <b>1.01</b> | <b>1.16</b> | <b>1.33</b> |
| <b>S.D</b>     | <b>0.01</b> | <b>0.08</b> | <b>0.06</b> | <b>0.06</b> | <b>0.14</b> | <b>0.09</b> |
| <b>n</b>       | <b>6.00</b> | <b>6.00</b> | <b>6.00</b> | <b>6.00</b> | <b>6.00</b> | <b>6.00</b> |
| <b>S.E</b>     | <b>0.01</b> | <b>0.03</b> | <b>0.02</b> | <b>0.02</b> | <b>0.06</b> | <b>0.04</b> |

|                 |             |             |             |             |             |             |
|-----------------|-------------|-------------|-------------|-------------|-------------|-------------|
| <b>n-hexane</b> |             |             |             |             |             |             |
| Rat 1           | 1.09        | 1.36        | 1.41        | 1.25        | 1.29        | 1.22        |
| Rat 2           | 1.09        | 1.12        | 1.36        | 1.52        | 1.5         | 1.08        |
| Rat 3           | 1.07        | 1.12        | 1.25        | 1.38        | 1.43        | 1.2         |
| Rat 4           | 1.08        | 1.20        | 1.34        | 1.38        | 1.41        | 1.17        |
| Rat 5           | 1.09        | 1.21        | 1.35        | 1.39        | 1.42        | 1.18        |
| Rat 6           | 1.07        | 1.19        | 1.33        | 1.37        | 1.4         | 1.16        |
| <b>Average</b>  | <b>1.08</b> | <b>1.20</b> | <b>1.34</b> | <b>1.38</b> | <b>1.41</b> | <b>1.17</b> |
| <b>S.D</b>      | <b>0.01</b> | <b>0.09</b> | <b>0.05</b> | <b>0.09</b> | <b>0.07</b> | <b>0.05</b> |
| <b>n</b>        | <b>6.00</b> | <b>6.00</b> | <b>6.00</b> | <b>6.00</b> | <b>6.00</b> | <b>6.00</b> |
| <b>S.E</b>      | <b>0.00</b> | <b>0.04</b> | <b>0.02</b> | <b>0.03</b> | <b>0.03</b> | <b>0.02</b> |

|                      |             |             |             |             |             |             |
|----------------------|-------------|-------------|-------------|-------------|-------------|-------------|
| <b>Ethyl acetate</b> |             |             |             |             |             |             |
| Rat 1                | 0.99        | 1.07        | 0.98        | 1           | 0.98        | 1.24        |
| Rat 2                | 1.07        | 1.14        | 0.99        | 1.24        | 1.15        | 1.07        |
| Rat 3                | 1.08        | 1.39        | 1.26        | 1.3         | 1.5         | 1.3         |
| Rat 4                | 1.05        | 1.20        | 1.08        | 1.18        | 1.21        | 1.20        |
| Rat 5                | 1.06        | 1.21        | 1.09        | 1.19        | 1.22        | 1.21        |
| Rat 6                | 1.04        | 1.19        | 1.07        | 1.17        | 1.2         | 1.19        |
| <b>Average</b>       | <b>1.05</b> | <b>1.20</b> | <b>1.08</b> | <b>1.18</b> | <b>1.21</b> | <b>1.20</b> |
| <b>S.D</b>           | <b>0.03</b> | <b>0.11</b> | <b>0.10</b> | <b>0.10</b> | <b>0.17</b> | <b>0.08</b> |
| <b>n</b>             | <b>6.00</b> | <b>6.00</b> | <b>6.00</b> | <b>6.00</b> | <b>6.00</b> | <b>6.00</b> |
| <b>S.E</b>           | <b>0.01</b> | <b>0.04</b> | <b>0.04</b> | <b>0.04</b> | <b>0.07</b> | <b>0.03</b> |

|                   |             |             |             |             |             |             |
|-------------------|-------------|-------------|-------------|-------------|-------------|-------------|
| <b>Chloroform</b> |             |             |             |             |             |             |
| Rat 1             | 1.02        | 1.07        | 1.18        | 1.35        | 1.57        | 1.57        |
| Rat 2             | 1.08        | 1.01        | 1.01        | 1.08        | 1.07        | 1.15        |
| Rat 3             | 1.07        | 1.07        | 1.08        | 1.08        | 1.4         | 1.42        |
| Rat 4             | 1.06        | 1.05        | 1.09        | 1.17        | 1.35        | 1.38        |
| Rat 5             | 1.07        | 1.06        | 1.1         | 1.18        | 1.36        | 1.39        |
| Rat 6             | 1.05        | 1.04        | 1.08        | 1.16        | 1.34        | 1.37        |
| <b>Average</b>    | <b>1.06</b> | <b>1.05</b> | <b>1.09</b> | <b>1.17</b> | <b>1.35</b> | <b>1.38</b> |
| <b>S.D</b>        | <b>0.02</b> | <b>0.02</b> | <b>0.05</b> | <b>0.10</b> | <b>0.16</b> | <b>0.13</b> |
| <b>n</b>          | <b>6.00</b> | <b>6.00</b> | <b>6.00</b> | <b>6.00</b> | <b>6.00</b> | <b>6.00</b> |
| <b>S.E</b>        | <b>0.01</b> | <b>0.01</b> | <b>0.02</b> | <b>0.04</b> | <b>0.07</b> | <b>0.06</b> |

|                                              |  |             |              |              |              |              |
|----------------------------------------------|--|-------------|--------------|--------------|--------------|--------------|
| <b>Percentage inhibition of inflammation</b> |  |             |              |              |              |              |
| CMC vs Diclofenac                            |  | <b>8.39</b> | <b>33.60</b> | <b>28.82</b> | <b>23.23</b> | <b>12.26</b> |

|                      |  |            |       |       |       |       |
|----------------------|--|------------|-------|-------|-------|-------|
| CMC vs Ethanol       |  | 16.79      | 41.07 | 34.51 | 24.82 | 9.39  |
| CMC vs n-hexane      |  | -<br>11.92 | 11.71 | 10.37 | 8.59  | 20.44 |
| CMC vs Ethyl acetate |  | -<br>11.92 | 28.99 | 23.49 | 21.43 | 18.09 |
| CMC vs Chloroform    |  | 2.07       | 28.18 | 24.14 | 12.48 | 5.98  |

**Table S2: Analgesic activity raw data**

| Olive Oil   | 0 Min        | 30 Mins      | 60 Mins      | 90 Mins      | 120 Mins     |
|-------------|--------------|--------------|--------------|--------------|--------------|
| Mice 1      | 14.0         | 15.0         | 9.0          | 10.7         | 7.9          |
| Mice 2      | 7.0          | 10.0         | 9.2          | 11.0         | 10.5         |
| Mice 3      | 10.9         | 12.0         | 12.0         | 12.1         | 12.0         |
| Mice 4      | 14.0         | 15.0         | 9.0          | 10.7         | 7.9          |
| Mice 5      | 7.0          | 10.0         | 9.2          | 11.0         | 10.5         |
| Mice 6      | 10.9         | 12.0         | 12.0         | 12.1         | 12.0         |
| <b>Mean</b> | <b>10.63</b> | <b>12.33</b> | <b>10.07</b> | <b>11.27</b> | <b>10.13</b> |
| <b>SD</b>   | <b>3.14</b>  | <b>2.25</b>  | <b>1.50</b>  | <b>0.66</b>  | <b>1.86</b>  |
| <b>n</b>    | <b>6.00</b>  | <b>6.00</b>  | <b>6.00</b>  | <b>6.00</b>  | <b>6.00</b>  |
| <b>SEM</b>  | <b>1.28</b>  | <b>0.92</b>  | <b>0.61</b>  | <b>0.27</b>  | <b>0.76</b>  |

| Diclofenac  |              |              |              |              |              |
|-------------|--------------|--------------|--------------|--------------|--------------|
| Mice 1      | 9.4          | 8.3          | 13.1         | 14.2         | 10.8         |
| Mice 2      | 12.1         | 14.0         | 15.0         | 15.0         | 15.0         |
| Mice 3      | 11.7         | 15.0         | 15.0         | 15.0         | 15.0         |
| Mice 4      | 9.4          | 8.3          | 13.1         | 14.2         | 10.8         |
| Mice 5      | 12.1         | 14.0         | 15.0         | 15.0         | 15.0         |
| Mice 6      | 11.7         | 15.0         | 15.0         | 15.0         | 15.0         |
| <b>Mean</b> | <b>11.07</b> | <b>12.43</b> | <b>14.37</b> | <b>14.73</b> | <b>13.60</b> |
| <b>SD</b>   | <b>1.30</b>  | <b>3.23</b>  | <b>0.98</b>  | <b>0.41</b>  | <b>2.17</b>  |
| <b>n</b>    | <b>6.00</b>  | <b>6.00</b>  | <b>6.00</b>  | <b>6.00</b>  | <b>6.00</b>  |
| <b>SEM</b>  | <b>0.53</b>  | <b>1.32</b>  | <b>0.40</b>  | <b>0.17</b>  | <b>0.89</b>  |

| Aq.-ethanol |              |              |              |              |              |
|-------------|--------------|--------------|--------------|--------------|--------------|
| Mice 1      | 11.1         | 10.0         | 13.5         | 13.6         | 15.0         |
| Mice 2      | 8.3          | 9.5          | 15.0         | 15.0         | 15.0         |
| Mice 3      | 15.0         | 15.0         | 15.0         | 15.0         | 15.0         |
| Mice 4      | 11.1         | 10.0         | 13.5         | 13.6         | 15.0         |
| Mice 5      | 8.3          | 9.5          | 15.0         | 15.0         | 15.0         |
| Mice 6      | 15.0         | 15.0         | 15.0         | 15.0         | 14.9         |
| <b>Mean</b> | <b>11.47</b> | <b>11.50</b> | <b>14.50</b> | <b>14.53</b> | <b>14.98</b> |
| <b>SD</b>   | <b>3.01</b>  | <b>2.72</b>  | <b>0.77</b>  | <b>0.72</b>  | <b>0.04</b>  |
| <b>n</b>    | <b>6.00</b>  | <b>6.00</b>  | <b>6.00</b>  | <b>6.00</b>  | <b>6.00</b>  |
| <b>SEM</b>  | <b>1.23</b>  | <b>1.11</b>  | <b>0.32</b>  | <b>0.30</b>  | <b>0.02</b>  |

| n-hexane |     |      |     |      |      |
|----------|-----|------|-----|------|------|
| Mice 1   | 7.4 | 13.0 | 7.6 | 10.6 | 10.7 |

|                             |               |                           |              |              |              |
|-----------------------------|---------------|---------------------------|--------------|--------------|--------------|
| Mice 2                      | 10.2          | 12.3                      | 14.7         | 13.6         | 15.0         |
| Mice 3                      | 5.2           | 12.0                      | 15.0         | 13.7         | 15.0         |
| Mice 4                      | 7.4           | 13.0                      | 7.6          | 12.0         | 10.7         |
| Mice 5                      | 10.2          | 12.3                      | 14.7         | 13.6         | 15.0         |
| Mice 6                      | 5.2           | 12.0                      | 15.0         | 13.7         | 15.0         |
| <b>Mean</b>                 | <b>7.60</b>   | <b>12.43</b>              | <b>12.43</b> | <b>12.87</b> | <b>13.57</b> |
| <b>SD</b>                   | <b>2.24</b>   | <b>0.46</b>               | <b>3.75</b>  | <b>1.29</b>  | <b>2.22</b>  |
| <b>n</b>                    | <b>6.00</b>   | <b>6.00</b>               | <b>6.00</b>  | <b>6.00</b>  | <b>6.00</b>  |
| <b>SEM</b>                  | <b>0.92</b>   | <b>0.19</b>               | <b>1.53</b>  | <b>0.53</b>  | <b>0.91</b>  |
|                             |               |                           |              |              |              |
| <b>Ethyl acetate</b>        |               |                           |              |              |              |
| Mice 1                      | 9.0           | 8.1                       | 10.2         | 10.8         | 11.0         |
| Mice 2                      | 10.0          | 10.0                      | 14.6         | 11.3         | 12.6         |
| Mice 3                      | 9.0           | 6.3                       | 11.9         | 13.5         | 15.0         |
| Mice 4                      | 13.0          | 8.1                       | 10.2         | 11.6         | 11.0         |
| Mice 5                      | 10.0          | 10.0                      | 14.6         | 11.3         | 12.6         |
| Mice 6                      | 7.3           | 6.3                       | 10.9         | 13.5         | 15.0         |
| <b>Mean</b>                 | <b>9.72</b>   | <b>8.13</b>               | <b>12.07</b> | <b>11.99</b> | <b>12.87</b> |
| <b>SD</b>                   | <b>1.89</b>   | <b>1.65</b>               | <b>2.06</b>  | <b>1.18</b>  | <b>1.80</b>  |
| <b>n</b>                    | <b>6.00</b>   | <b>6.00</b>               | <b>6.00</b>  | <b>6.00</b>  | <b>6.00</b>  |
| <b>SEM</b>                  | <b>0.77</b>   | <b>0.68</b>               | <b>0.84</b>  | <b>0.48</b>  | <b>0.74</b>  |
|                             |               |                           |              |              |              |
| <b>Chloroform</b>           |               |                           |              |              |              |
| Mice 1                      | 9.8           | 8.3                       | 8.4          | 11.5         | 12.5         |
| Mice 2                      | 9.9           | 10.4                      | 15.0         | 15.0         | 15.0         |
| Mice 3                      | 6.9           | 14.9                      | 15.0         | 9.3          | 13.3         |
| Mice 4                      | 9.8           | 8.3                       | 8.4          | 11.5         | 12.5         |
| Mice 5                      | 9.9           | 10.4                      | 15.0         | 15.0         | 15.0         |
| Mice 6                      | 6.9           | 14.9                      | 15.0         | 9.3          | 13.3         |
| <b>Mean</b>                 | <b>8.87</b>   | <b>11.20</b>              | <b>12.80</b> | <b>11.93</b> | <b>13.60</b> |
| <b>SD</b>                   | <b>1.52</b>   | <b>3.02</b>               | <b>3.41</b>  | <b>2.57</b>  | <b>1.14</b>  |
| <b>n</b>                    | <b>6.00</b>   | <b>6.00</b>               | <b>6.00</b>  | <b>6.00</b>  | <b>6.00</b>  |
| <b>SEM</b>                  | <b>0.62</b>   | <b>1.23</b>               | <b>1.39</b>  | <b>1.05</b>  | <b>0.47</b>  |
|                             |               |                           |              |              |              |
| <b>% inhibition of pain</b> |               |                           |              |              |              |
| CMC vs Diclofenac           | <b>9.92</b>   | <b>3.75</b>               | <b>87.16</b> | <b>92.86</b> | <b>71.23</b> |
| CMC vs Ethanol              | <b>19.08</b>  | <b>-31.25</b>             | <b>89.86</b> | <b>87.50</b> | <b>99.66</b> |
| CMC vs n-hexane             | <b>-69.47</b> | <b>3.75</b>               | <b>47.97</b> | <b>42.86</b> | <b>70.55</b> |
| CMC vs Ethyl acetate        | <b>-20.99</b> | <b>-</b><br><b>157.50</b> | <b>40.54</b> | <b>19.42</b> | <b>56.16</b> |
| CMC vs Chloroform           | <b>-40.46</b> | <b>-42.50</b>             | <b>55.41</b> | <b>17.86</b> | <b>71.23</b> |

**Table S3: Cytotoxic activity raw data**

| Conc.<br>µg/ml | MDA   |       |       | Average      | S.D         | n        | S.E         |
|----------------|-------|-------|-------|--------------|-------------|----------|-------------|
| 400            | 95.29 | 96.79 | 89.72 | <b>93.93</b> | <b>3.73</b> | <b>3</b> | <b>2.15</b> |

|      |        |        |        |               |              |          |             |
|------|--------|--------|--------|---------------|--------------|----------|-------------|
| 200  | 97.64  | 97.64  | 99.57  | <b>98.28</b>  | <b>1.11</b>  | <b>3</b> | <b>0.64</b> |
| 100  | 98.07  | 116.27 | 99.79  | <b>104.71</b> | <b>10.05</b> | <b>3</b> | <b>5.80</b> |
| 50   | 105.78 | 91.01  | 101.28 | <b>99.36</b>  | <b>7.57</b>  | <b>3</b> | <b>4.37</b> |
| 25   | 112.63 | 114.99 | 113.49 | <b>113.70</b> | <b>1.19</b>  | <b>3</b> | <b>0.69</b> |
| 12.5 | 115.42 | 104.71 | 110.92 | <b>110.35</b> | <b>5.38</b>  | <b>3</b> | <b>3.10</b> |
| 6.25 | 101.07 | 101.93 | 105.57 | <b>102.86</b> | <b>2.39</b>  | <b>3</b> | <b>1.38</b> |

|      |        |        |        |               |              |          |             |
|------|--------|--------|--------|---------------|--------------|----------|-------------|
|      | PANC-1 |        |        |               |              |          |             |
| 400  | 65.22  | 67.89  | 77.26  | <b>70.12</b>  | <b>6.32</b>  | <b>3</b> | <b>3.65</b> |
| 200  | 97.32  | 119.06 | 99.33  | <b>105.24</b> | <b>12.01</b> | <b>3</b> | <b>6.94</b> |
| 100  | 118.73 | 111.04 | 128.43 | <b>119.40</b> | <b>8.71</b>  | <b>3</b> | <b>5.03</b> |
| 50   | 109.7  | 138.46 | 112.37 | <b>120.18</b> | <b>15.89</b> | <b>3</b> | <b>9.17</b> |
| 25   | 101    | 109.03 | 102.34 | <b>104.12</b> | <b>4.30</b>  | <b>3</b> | <b>2.48</b> |
| 12.5 | 122.07 | 132.11 | 131.77 | <b>128.65</b> | <b>5.70</b>  | <b>3</b> | <b>3.29</b> |
| 6.25 | 107.36 | 106.76 | 124.08 | <b>112.73</b> | <b>9.83</b>  | <b>3</b> | <b>5.68</b> |

|      |        |        |        |               |              |          |              |
|------|--------|--------|--------|---------------|--------------|----------|--------------|
|      | MCF7   |        |        |               |              |          |              |
| 400  | 88.2   | 90.49  | 83     | <b>87.23</b>  | <b>3.84</b>  | <b>3</b> | <b>2.22</b>  |
| 200  | 110.92 | 98.84  | 113.28 | <b>107.68</b> | <b>7.75</b>  | <b>3</b> | <b>4.47</b>  |
| 100  | 94.41  | 89.98  | 84.91  | <b>89.77</b>  | <b>4.75</b>  | <b>3</b> | <b>2.74</b>  |
| 50   | 103    | 101.93 | 102.14 | <b>102.36</b> | <b>0.57</b>  | <b>3</b> | <b>0.33</b>  |
| 25   | 128.27 | 108.97 | 97.99  | <b>111.74</b> | <b>15.33</b> | <b>3</b> | <b>8.85</b>  |
| 12.5 | 105.7  | 87.13  | 122.48 | <b>105.10</b> | <b>17.68</b> | <b>3</b> | <b>10.21</b> |
| 6.25 | 121.13 | 111.56 | 107.28 | <b>113.32</b> | <b>7.09</b>  | <b>3</b> | <b>4.09</b>  |

|      |            |        |        |               |             |          |             |
|------|------------|--------|--------|---------------|-------------|----------|-------------|
|      | Fibroblast |        |        |               |             |          |             |
| 400  | 64.24      | 64.03  | 69.16  | <b>65.81</b>  | <b>2.90</b> | <b>3</b> | <b>1.68</b> |
| 200  | 84.15      | 91.01  | 96.79  | <b>90.65</b>  | <b>6.33</b> | <b>3</b> | <b>3.65</b> |
| 100  | 87.37      | 85.44  | 89.51  | <b>87.44</b>  | <b>2.04</b> | <b>3</b> | <b>1.18</b> |
| 50   | 105.35     | 100    | 90.58  | <b>98.64</b>  | <b>7.48</b> | <b>3</b> | <b>4.32</b> |
| 25   | 100.64     | 105.35 | 113.49 | <b>106.49</b> | <b>6.50</b> | <b>3</b> | <b>3.75</b> |
| 12.5 | 116.49     | 119.49 | 108.78 | <b>114.92</b> | <b>5.52</b> | <b>3</b> | <b>3.19</b> |
| 6.25 | 114.56     | 104.07 | 113.06 | <b>110.56</b> | <b>5.67</b> | <b>3</b> | <b>3.28</b> |
